# Supplementary material
Source: Elsevier journal article supplement (https://www.sciencedirect.com/science/article/pii/S1695403320304409)
Supplement: mmc1 [file S1695403320304409:mmc1.doc]

**ANPEDIA-20-761**

**E-APPENDED**

**CALENDARIO DE VACUNACIONES DE LA ASOCIACIÓN ESPAÑOLA DE PEDIATRÍA: RECOMENDACIONES 2021**

**Título abreviado:** Calendario de vacunaciones de la Asociación Española de Pediatría: recomendaciones 2021

Francisco José Álvarez García*, María José Cilleruelo Ortega, Javier Álvarez Aldeán, María Garcés-Sánchez, Nuria García Sánchez, Elisa Garrote Llanos, Ángel Hernández Merino, Antonio Iofrío de Arce, Abián Montesdeoca Melián, María Luisa Navarro Gómez y Jesús Ruiz-Contreras, en representación del Comité Asesor de Vacunas de la Asociación Española de Pediatría (CAV-AEP)◊

*Correo electrónico: [pacoalvarez1959@yahoo.es](mailto:pacoalvarez1959@yahoo.es)

◊Los miembros del Comité Asesor de Vacunas de la Asociación Española de Pediatría (CAV-AEP) se presentan en el Anexo 1.
