# Supplementary material
Source: Elsevier journal article supplement (https://www.sciencedirect.com/science/article/pii/S1695403320304409)
Supplement: mmc2 [file S1695403320304409:mmc2.doc]

**Resumen**

El CAV-AEP publica anualmente el calendario de vacunaciones que estima idóneo para los niños y adolescentes residentes en España, teniendo en cuenta la evidencia científica disponible.

Se mantiene el esquema 2+1 (2, 4 y 11 meses) con vacunas hexavalentes (DTPa-VPI-Hib-HB) y con antineumocócica conjugada 13-valente.

Se aconseja un refuerzo a los 6 años, preferentemente con DTPa (si está disponible), junto a una dosis de polio para aquellos que recibieron esquemas 2+1, así como vacunación con Tdpa en adolescentes y en cada embarazo, preferentemente entre las 27 y 32 semanas.

La vacuna del rotavirus debería ser sistemática para todos los lactantes.

Se insiste en la incorporación en el calendario de la vacuna antimeningocócica B, con esquema 2+1 en lactantes.

Además de la inclusión de la vacuna antimeningocócica conjugada tetravalente (MenACWY) a los 12 años con rescate hasta 18 años, inclusive, el CAV-AEP recomienda que esta vacuna sea introducida también a los 12 meses de edad, sustituyendo a MenC. Igualmente, se recomienda en los mayores de 6 semanas de edad con factores de riesgo o que viajen a países de elevada incidencia de estos serogrupos.

Se emplearán esquemas de dos dosis para triple vírica (12 meses y 3-4 años) y varicela (15 meses y 3-4 años). La segunda dosis se podría aplicar como vacuna tetravírica.

Se recomienda la vacunación sistemática universal frente al VPH, con independencia del género, preferentemente a los 12 años, insistiendo en un mayor esfuerzo para mejorar las coberturas. La de 9 genotipos amplía la cobertura para ambos sexos.

**Palabras clave**: Vacunas. Calendario de vacunación. Enfermedades inmunoprevenibles. Lactante. Niño. Adolescente.
